# Supplementary material for: Self-sustaining IL-8 loops drive a prothrombotic neutrophil phenotype in severe COVID-19
Source: PubMed Central journal article supplement (PMC8492337; doi:10.1172/jci.insight.150862), 2021-09-22
Supplement: jciinsight-6-150862-s268.pdf [file jciinsight-6-150862-s268.pdf]

## **Supplemental Information**

### **Self-sustaining interleukin-8 loops drive a prothrombotic neutrophil phenotype in severe COVID-19**

Rainer Kaiser<sup>1,2,3\*</sup>, Alexander Leunig<sup>1,2,\*§</sup>, Kami Pekayvaz<sup>1,2,3\*</sup>, Oliver Popp<sup>4,5</sup>, Markus Joppich<sup>6</sup>, Vivien Polewka<sup>1</sup>, Raphael Escaig<sup>1</sup>, Afra Anjum<sup>1</sup>, Marie-Louise Hoffknecht<sup>1</sup>, Christoph Gold<sup>1</sup>, Sophia Brambs<sup>1</sup>, Anouk Engel<sup>1</sup>, Sven Stockhausen<sup>1,2</sup>, Viktoria Knottenberg<sup>1</sup>, Anna Titova<sup>1</sup>, Mohamed Hajji<sup>4,5</sup>, Clemens Scherer<sup>1,2,3</sup>, Maximilian Muenchhoff<sup>3,8,9</sup>, Johannes C. Hellmuth<sup>3,10</sup>, Kathrin Saar<sup>4,5</sup>, Benjamin Schubert<sup>11,12,13</sup>, Anne Hilgendorff<sup>13,14,15</sup>, Christian Schulz<sup>1,2</sup>, Stefan Käab<sup>1,2,3</sup>, Ralf Zimmer<sup>6</sup>, Norbert Hübner<sup>4,5,7</sup>, Steffen Massberg<sup>1,2,3</sup>, Philipp Mertins<sup>4,5</sup>, Leo Nicolai<sup>1,2,3,#§</sup>, Konstantin Stark<sup>1,2,3,#</sup>

#### **Affiliations:**

- 1 Department of Medicine I, University Hospital, Ludwig-Maximilians University Munich, Germany
- 2 DZHK (German Centre for Cardiovascular Research), partner site Munich Heart Alliance, Germany
- 3 COVID-19 Registry of the LMU Munich (CORKUM), University Hospital, Ludwig-Maximilians University Munich
- 4 Max Delbrück Center for Molecular Medicine (MDC) in the Helmholtz Association, Berlin, Germany
- 5 DZHK (German Centre for Cardiovascular Research), partner site Berlin, Germany
- 6 Department of Informatics, Ludwig-Maximilians-Universität München, Munich, Germany
- 7 Charité-Universitätsmedizin Berlin, Germany
- 8 Max von Pettenkofer Institute & GeneCenter, Virology, Faculty of Medicine, Ludwig-Maximilians University, Munich, Germany
- 9 German Center for Infection Research (DZIF), Partner Site Munich
- 10 Medizinische Klinik und Poliklinik III, University Hospital, Ludwig-Maximilians University Munich, Germany
- 11 Institute of Computational Biology, Helmholtz Zentrum München—German Research Center for Environmental Health, Neuherberg 85764, Germany
- 12 Department of Mathematics, Technical University of Munich, Garching bei München 85748, Germany
- 13 On behalf of the COMBAT C19IR study group
- 14 Institute for Lung Biology and Disease and Comprehensive Pneumology Center with the CPC-M bioArchive, Helmholtz Center Munich, Member of the German Center for Lung Research (DZL), Munich, Germany
- 15 Center for Comprehensive Developmental Care (CDeC<sup>LMU</sup>) at the interdisciplinary Social Pediatric Center, Haurersches Children's Hospital, University Hospital Ludwig-Maximilian University, Munich, Germany

\* Contributed equally, ordered alphabetically

# Contributed equally, ordered alphabetically

§ Correspondence to: [Alexander.Leunig@med.uni-muenchen.de](mailto:Alexander.Leunig@med.uni-muenchen.de), [Leo.Nicolai@med.uni-muenchen.de](mailto:Leo.Nicolai@med.uni-muenchen.de), Medizinische Klinik und Poliklinik I, University Hospital Ludwig-Maximilians University Munich, Marchioninstr. 15, 81377, Munich, Germany. Tel.: +49 89 2180 76582 Fax: +49 89 2180 76583.

# Supplemental Figures

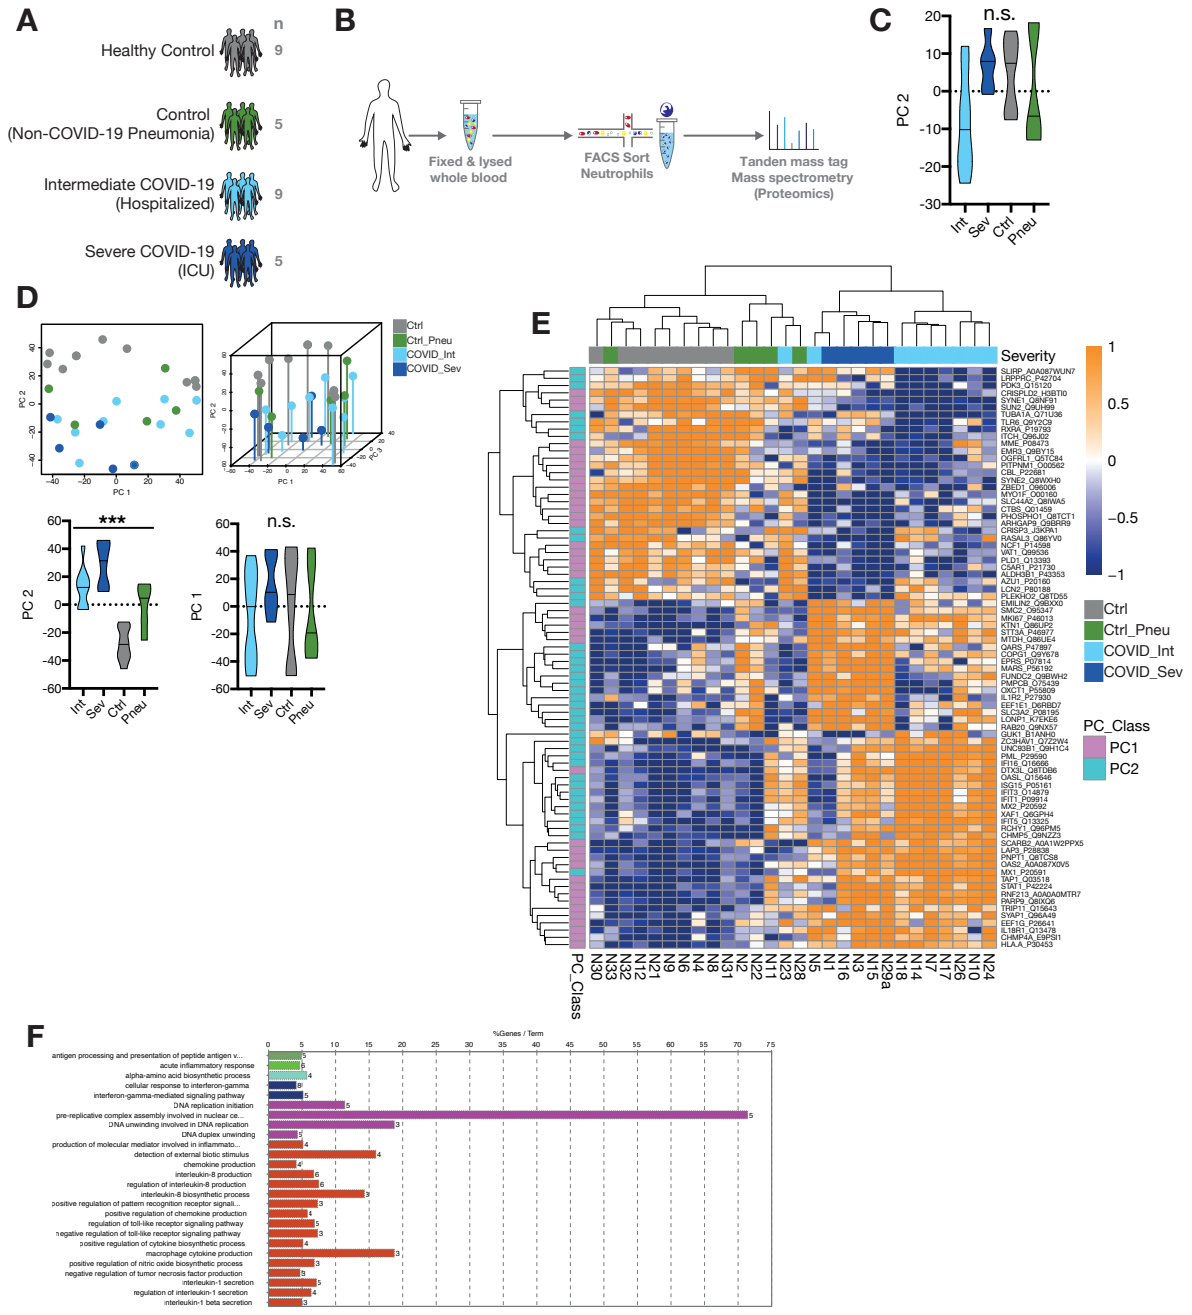

**Suppl Figure 1 | a-b**, Patient population and workflow for neutrophil proteomics **c**, Positions of patient neutrophil samples on PC 2 of **Fig. 1a**. One-way ANOVA. **d**, Principal component analysis of neutrophils of patients, by group. All proteins included. Violin plots of positions of patient neutrophil samples on PC 1&2. One-way ANOVA. **e**, Top 20 PCA loadings for PC1 and PC2 of a moderated F-test over all four patient groups. **f**, ClueGo upregulated neutrophil proteome functional network and chart of severe COVID-19 compared to intermediate COVID-19 (see methods). Full ClueGo term names are shown in Suppl. Table 5. **a-f**: n=9 healthy control, n=5 pneumonic control, n=5 severe COVID-19 and n=9 intermediate COVID-19 patients. \*p<0.05, \*\*p<0.01, \*\*\*p<0.001.

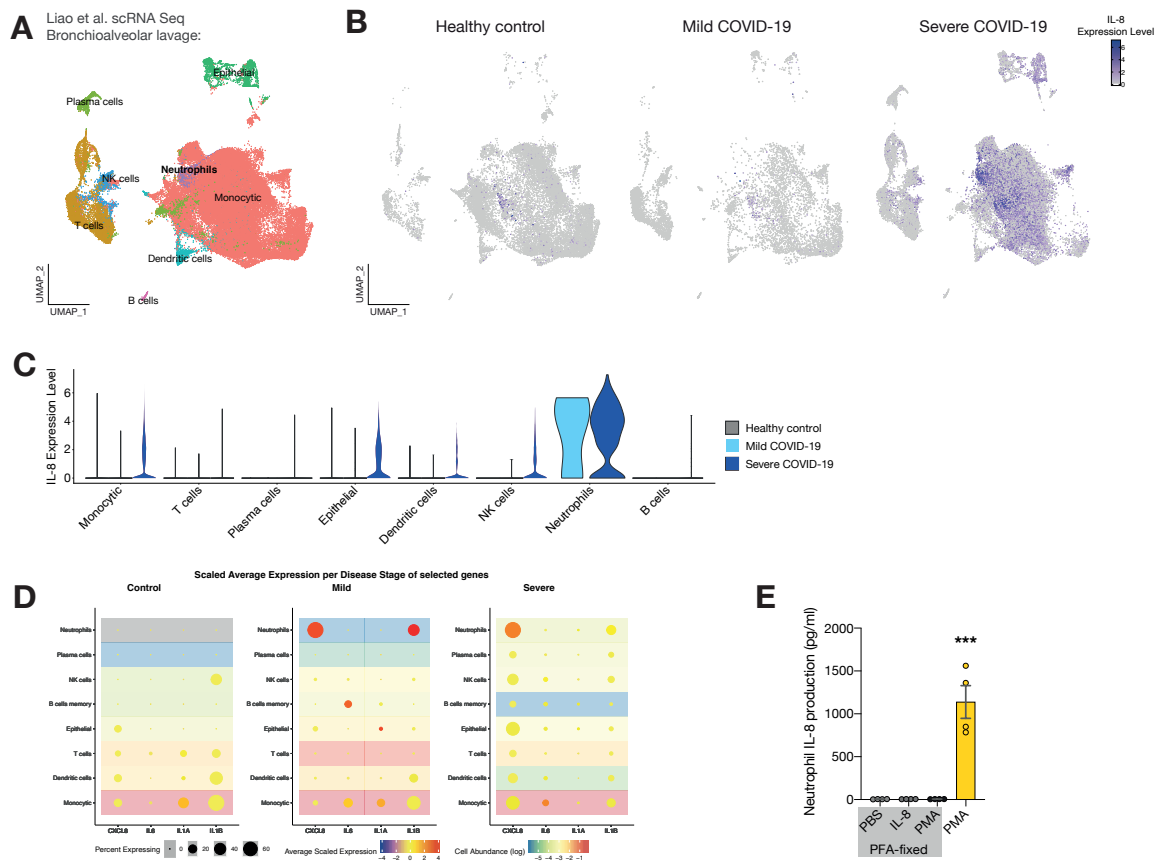

**Suppl. Figure 2 | a-b**, UMAP of cells from scRNA-seq bronchioalveolar lavage data of Liao et al. (see ref. 25). Annotated cell type in UMAP and feature plot of IL-8 expression by patient population. **c**, Violin plot of IL-8 expression by cell type and patient population. n [neutrophils] = 3 for intermediate and 807 for severe COVID-19. Since no neutrophils were detected in BALF derived from healthy patients, no violin plot depicting IL-8 production in these cells is shown. **d**, Dot-plot of the scaled average expression of CXCL (IL-8), IL-6, IL-1alpha and IL-1beta from scRNA-seq bronchioalveolar lavage data of Liao et al. **e**, IL-8 production assay results with either 4% PFA-fixed or unfixed neutrophils and the addition of PBS, IL-8 or PMA. One-way ANOVA with post-hoc Dunnett's multiple comparisons test comparing IL-8 to the other conditions. n=4 neutrophil donors. Mean  $\pm$ sem is shown. \*p<0.05, \*\*p<0.01, \*\*\*p<0.001.

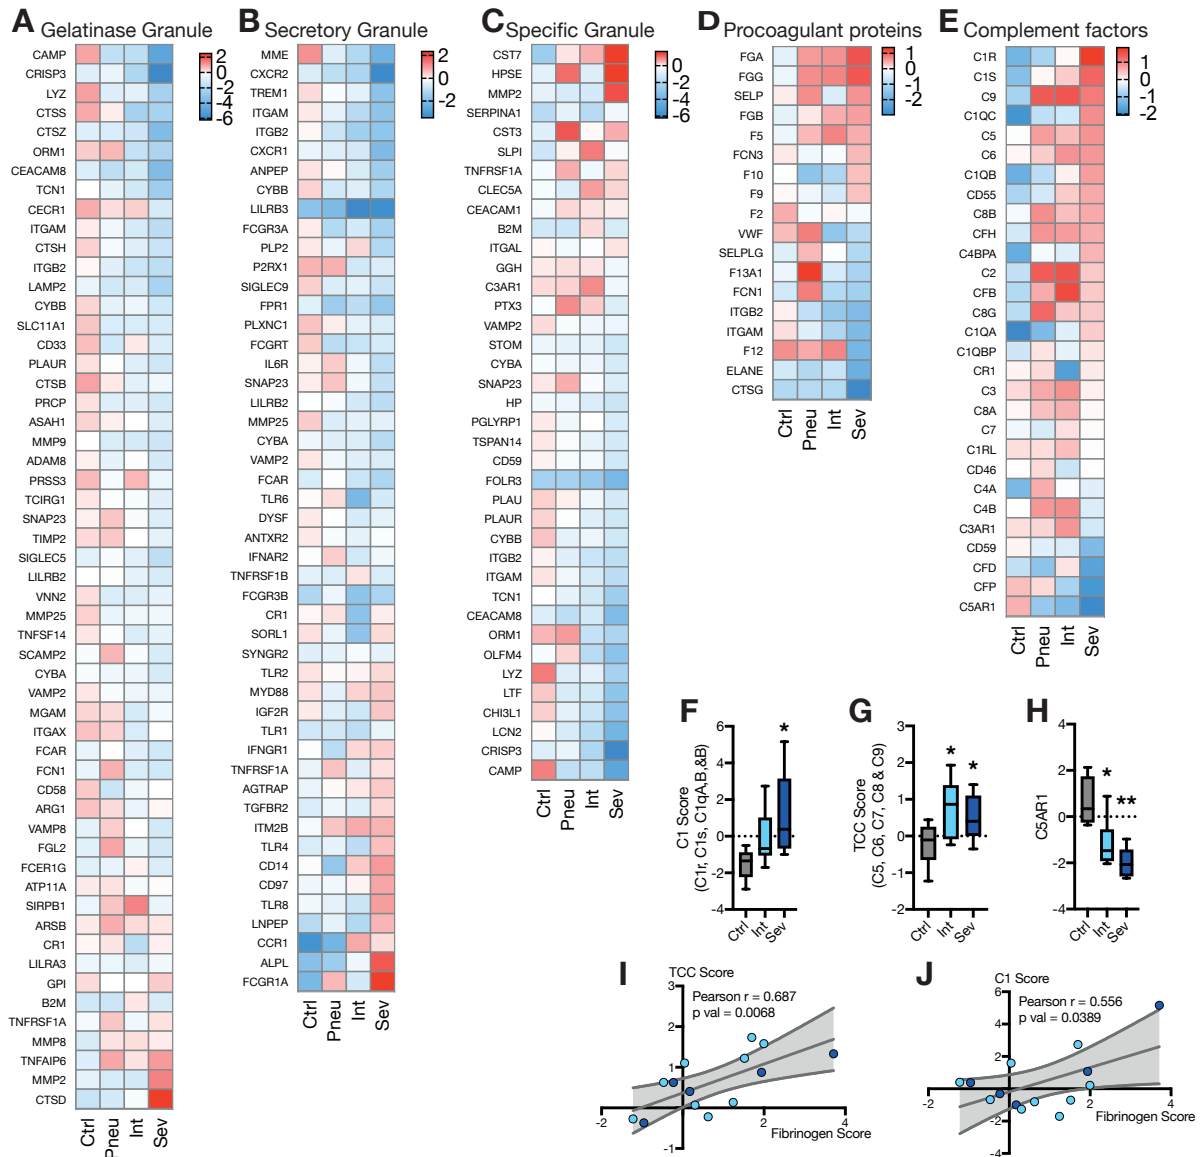

**Suppl. Figure 3 | a-c,** Heat maps of mean gelatinase/primary, secretory/secondary and specific/tertiary granule protein abundance by group. **d,** Heat map of mean procoagulant proteins abundance by group. **e,** Heat map of mean complement factor protein abundance by group. **f-g,** Box plot of Terminal complement complex (TCC) and C1 score by group. Unpaired, two-sided t-tests comparing to control. **h,** Box plot of C5AR1 abundance by group. Adjusted p-values. **i-j,** Linear regression of fibrinogen protein abundance on neutrophils and terminal complement complex or C1 protein abundance on neutrophils. Pearson  $r$  is shown, p-value signifies slope significantly non-zero. 95% confidence interval shown in gray.  $n=5$  severe and 9 intermediate COVID-19 patients. \* $p<0.05$ , \*\* $p<0.01$ , \*\*\* $p<0.001$ .

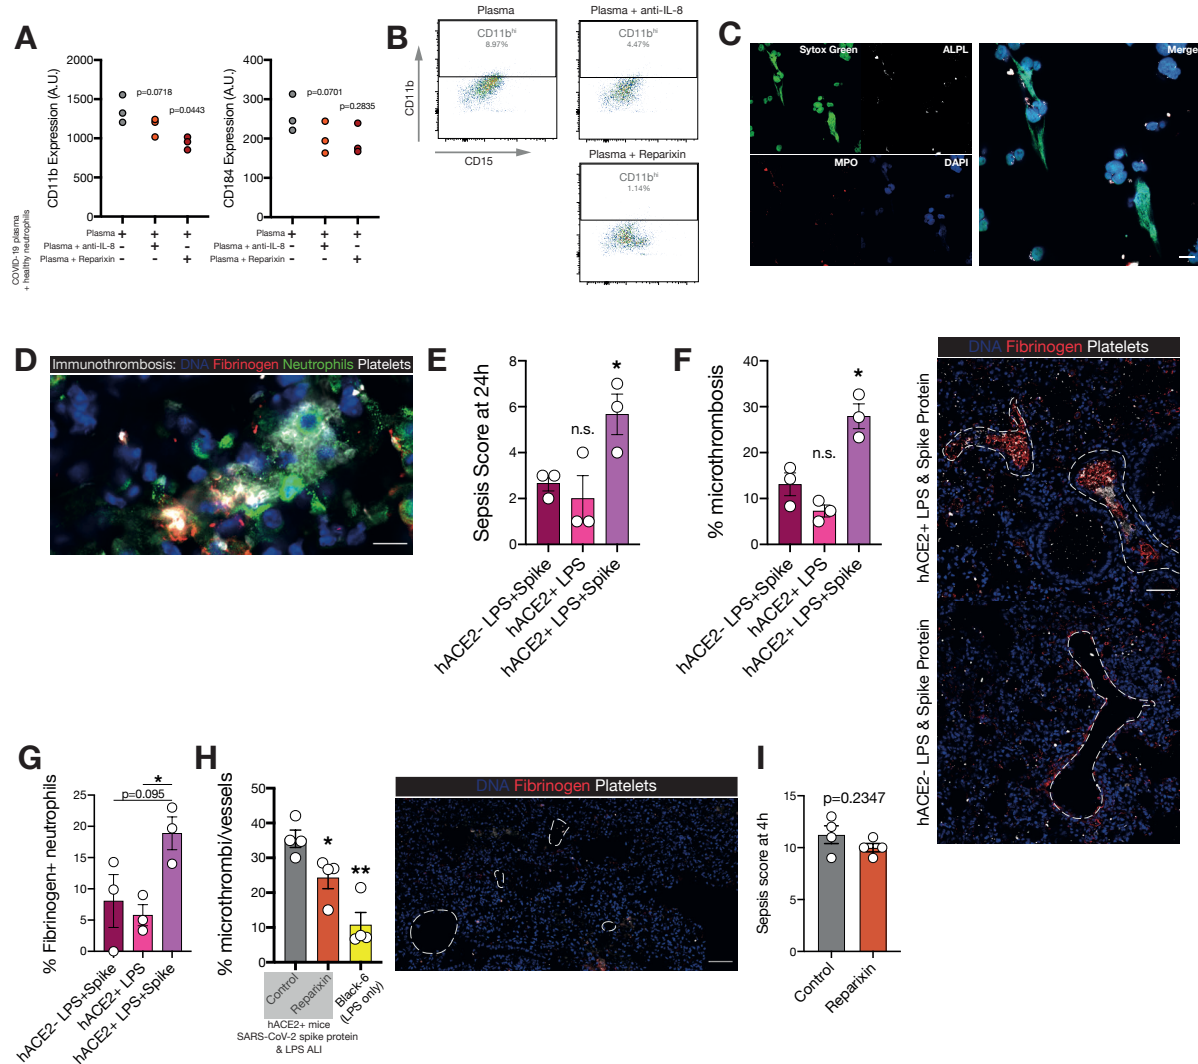

**Suppl. Figure 4 | a**, Surface marker expression (CD11b & CD184) of healthy neutrophils stimulated with COVID-19 plasma and PBS, anti-IL-8 antibodies or reparixin. Paired two-sided t-test, n=3 COVID-19 patient plasma samples. **b**, Illustrative flow-cytometry plots of healthy neutrophils stimulated with COVID-19 plasma and PBS, anti-IL-8 antibodies or reparixin. Percentage of positive cells shown in gate. **c**, Separate channels and merge of image from **4d**. Sytox green channel for NET identification is also shown. Scale bar 10 μm. **d**, Micrograph of immunothrombotic occlusion in one vessel observed in the lung of hACE2 SARS-CoV-2 Spike protein lung injury mice. Scale bar 10μm. **e-f**, Clinical sepsis score at 24 h post treatment of hACE2<sup>+</sup> and hACE2<sup>-</sup> animals treated with LPS, or LPS and spike protein. **f**, Quantification and representative micrographs of microthrombi in lungs of hACE2<sup>+</sup> and hACE2<sup>-</sup> animals treated with LPS, or LPS and spike protein. Vessel borders are shown with dashed white lines. Scale bar 50 μm. **g**, Quantification of fibrinogen-positive neutrophils in vessels in the lungs of hACE2<sup>+</sup> and hACE2<sup>-</sup> animals treated with LPS, or LPS and spike protein. **e-g**: Two tailed unpaired t-tests, n=3 per group. **h**, Quantification of microthrombi in lungs of control or

reparixin treated K18-hACE2 mice as shown in Fig 4h, in addition to LPS-treated C57BL/6 mice (WT). Representative micrograph of vessels of LPS-only treated WT animals shown, representative micrographs of the other groups shown in **4h. i**, Clinical sepsis score at 4h post S1 Spike protein-induced lung injury for control and reparixin treated hACE2 mice. **h-i**: Two tailed unpaired t-tests, n=4 per group. Mean  $\pm$ sem is shown. \*p<0.05, \*\*p<0.01, \*\*\*p<0.001.

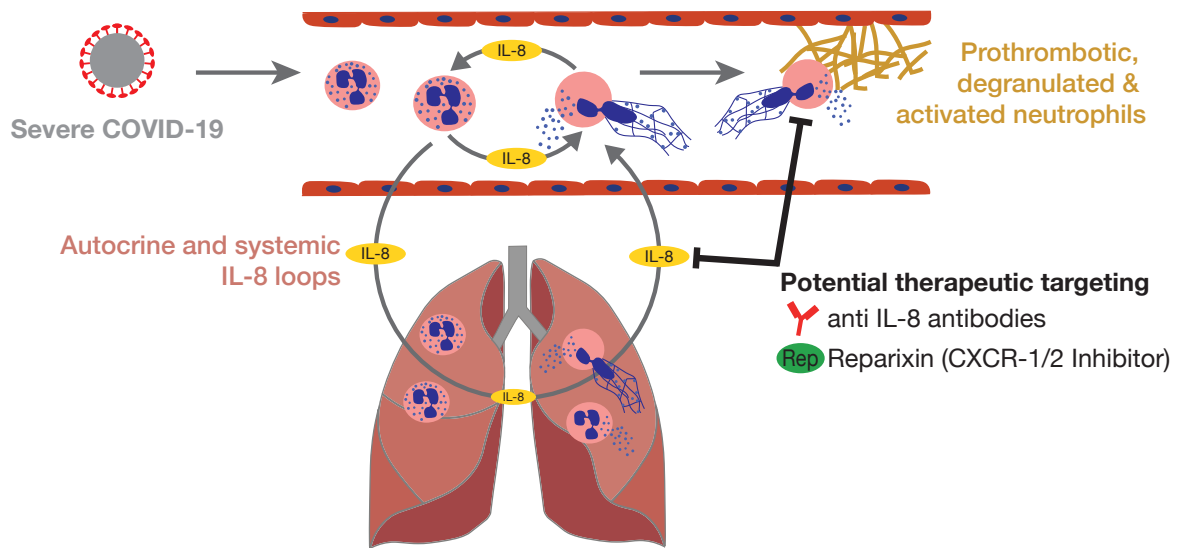

**Graphical abstract.** Neutrophils in the circulation and in the lung of severe COVID-19 patients are activated through systemic and autocrine interleukin 8 (IL-8) loops. These loops lead to a degranulated and prothrombotic neutrophil phenotype, especially in severe COVID-19 compared to both intermediate COVID-19 and other viral pneumonias. Therapeutic targeting of IL-8 by either anti IL-8 antibodies or the CXCR-1/-2 blocker reparixin reduces SARS-CoV-2-driven neutrophil degranulation, NETosis and pulmonary microthrombosis.

**Supplemental Tables**

| <b>Suppl. Table 1   Proteome score data</b> |                   |                                  |                                 |                                 |                               |
|---------------------------------------------|-------------------|----------------------------------|---------------------------------|---------------------------------|-------------------------------|
| <b>ISG Score</b>                            | <b>IL-8 Score</b> | <b>Azurophilic Granule Score</b> | <b>Gelatinase Granule Score</b> | <b>Secretory Vesicles Score</b> | <b>Specific Granule Score</b> |
| MX1                                         | AIFM1             | BPI                              | CTSD                            | FCGR1A                          | CST7                          |
| IFIT1                                       | AKT1              | LAMP1                            | MMP2                            | ALPL                            | HPSE                          |
| ISG15                                       | CD74              | PSEN1                            | TNFAIP6                         | CCR1                            | MMP2                          |
| IFIT3                                       | CNP               | VNN1                             | MMP8                            | LNPEP                           | SERPINA1                      |
| IFIT2                                       | CRYZ              | AZU1                             | TNFRSF1A                        | TLR8                            | CST3                          |
| IFIT5                                       | CXCR1             | HEXB                             | B2M                             | CD97                            | SLPI                          |
| XAF1                                        | CXCR2             | ARG1                             | GPI                             | CD14                            | TNFRSF1A                      |
| MX2                                         | ICAM1             | FUCA2                            | LILRA3                          | TLR4                            | CLEC5A                        |
| IFI30                                       | IRAK4             | GNS                              | CR1                             | ITM2B                           | CEACAM1                       |
| IFI16                                       | ITGAL             | GLB1                             | ARSB                            | TGFBR2                          | B2M                           |
| IFI44                                       | LBP               | ORM2                             | SIRPB1                          | AGTRAP                          | ITGAL                         |
| IFI35                                       | MAPK3             | CEACAM6                          | ATP11A                          | TNFRSF1A                        | GGH                           |
| IFITM3                                      | MTOR              | ACPP                             | FCER1G                          | IFNGR1                          | C3AR1                         |
| IRF9                                        | MYD88             | GALNS                            | FGL2                            | TLR1                            | PTX3                          |
| IRF2BP1                                     | PLCB2             | MAN2B1                           | VAMP8                           | IGF2R                           | VAMP2                         |
| ISG20                                       | PSMD12            | HEXA                             | ARG1                            | MYD88                           | STOM                          |
| IRF2BP2                                     | PTK2B             | SDCBP                            | CD58                            | TLR2                            | CYBA                          |
| IRF1                                        | TLR4              | CD63                             | FCN1                            | SYNGR2                          | SNAP23                        |
| IRF3                                        | TLR5              | ELANE                            | FCAR                            | SORL1                           | HP                            |
| IRF2BPL                                     | TLR8              | MPO                              | ITGAX                           | CR1                             | PGLYRP1                       |
|                                             | VEGFA             | GLA                              | MGAM                            | FCGR3B                          | TSPAN14                       |
|                                             |                   | CTSG                             | VAMP2                           | TNFRSF1B                        | CD59                          |
|                                             |                   | PRTN3                            | CYBA                            | IFNAR2                          | FOLR3                         |
|                                             |                   | GUSB                             | SCAMP2                          | ANTXR2                          | PLAU                          |
|                                             |                   | LYZ                              | TNFSF14                         | DYSF                            | PLAUR                         |
|                                             |                   |                                  | MMP25                           | TLR6                            | CYBB                          |
| <b>TCC Score</b>                            | <b>C1 Score</b>   | <b>Fibrinogen Score</b>          | <b>VNN2</b>                     | <b>FCAR</b>                     | <b>ITGB2</b>                  |
| C9                                          | C1R               | FGA                              | LILRB2                          | VAMP2                           | ITGAM                         |
| C8G                                         | C1S               | FGB                              | SIGLEC5                         | CYBA                            | TCN1                          |
| C8B                                         | C1QA              | FGG                              | TIMP2                           | MMP25                           | CEACAM8                       |
| C8A                                         | C1QB              |                                  | SNAP23                          | LILRB2                          | ORM1                          |
| C7                                          | C1QC              |                                  | TCIRG1                          | SNAP23                          | OLFM4                         |
| C6                                          |                   |                                  | PRSS3                           | IL6R                            | LYZ                           |
| C5                                          |                   |                                  | ADAM8                           | FCGRT                           | LTF                           |
|                                             |                   |                                  | MMP9                            | PLXNC1                          | CHI3L1                        |
|                                             |                   |                                  | ASAH1                           | FPR1                            | LCN2                          |
|                                             |                   |                                  | PRCP                            | SIGLEC9                         | CRISP3                        |
|                                             |                   |                                  | CTSB                            | P2RX1                           | CAMP                          |
|                                             |                   |                                  | PLAUR                           | PLP2                            |                               |
|                                             |                   |                                  | CD33                            | FCGR3A                          |                               |
|                                             |                   |                                  | SLC11A1                         | LILRB3                          |                               |
|                                             |                   |                                  | CYBB                            | CYBB                            |                               |
|                                             |                   |                                  | LAMP2                           | ANPEP                           |                               |
|                                             |                   |                                  | ITGB2                           | CXCR1                           |                               |
|                                             |                   |                                  | CTSH                            | ITGB2                           |                               |
|                                             |                   |                                  | ITGAM                           | ITGAM                           |                               |
|                                             |                   |                                  | CECR1                           | TREM1                           |                               |
|                                             |                   |                                  | TCN1                            | CXCR2                           |                               |
|                                             |                   |                                  | CEACAM8                         | MME                             |                               |
|                                             |                   |                                  | ORM1                            |                                 |                               |
|                                             |                   |                                  | CTSZ                            |                                 |                               |
|                                             |                   |                                  | CTSS                            |                                 |                               |
|                                             |                   |                                  | LYZ                             |                                 |                               |
|                                             |                   |                                  | CRISP3                          |                                 |                               |
|                                             |                   |                                  | CAMP                            |                                 |                               |

| <b>Suppl. Table 2   Cell type annotation Liao et al.</b> |            |                |             |               |
|----------------------------------------------------------|------------|----------------|-------------|---------------|
| <b>cluster</b>                                           | <b>all</b> | <b>control</b> | <b>mild</b> | <b>severe</b> |
| Monocytic                                                | 48893      | 17857          | 4157        | 26879         |
| T cells                                                  | 7533       | 760            | 2333        | 4440          |
| Plasma cells                                             | 1179       | 1              | 7           | 1171          |
| Epithelial                                               | 2275       | 50             | 219         | 2006          |
| Dendritic cells                                          | 1224       | 518            | 356         | 350           |
| NK cells                                                 | 1624       | 19             | 175         | 1430          |
| Neutrophils                                              | 810        | 0              | 3           | 807           |
| B cells memory                                           | 202        | 18             | 66          | 118           |

| <b>Suppl. Table 3   Cell type annotation Wauters et al.</b> |                    |                   |                     |                  |                    |
|-------------------------------------------------------------|--------------------|-------------------|---------------------|------------------|--------------------|
| <b>Cluster</b>                                              | <b>Cell Number</b> | <b>Covid_mild</b> | <b>Covid_severe</b> | <b>Pneu_mild</b> | <b>Pneu_severe</b> |
| <b>AT2</b>                                                  | 866                | 1                 | 245                 | 431              | 189                |
| <b>Alveolar_macrophage</b>                                  | 1960               | 26                | 538                 | 1391             | 5                  |
| <b>B_cell</b>                                               | 439                | 8                 | 387                 | 44               | 0                  |
| <b>Basal</b>                                                | 1110               | 24                | 579                 | 466              | 41                 |
| <b>CD4_Tcell</b>                                            | 2722               | 38                | 2063                | 621              | 0                  |
| <b>CD8_Tcell</b>                                            | 1455               | 45                | 1033                | 376              | 1                  |
| <b>Ciliated</b>                                             | 6801               | 238               | 3707                | 2479             | 377                |
| <b>Inflammatory</b>                                         | 636                | 3                 | 357                 | 276              | 0                  |
| <b>Mast_cell</b>                                            | 325                | 1                 | 29                  | 295              | 0                  |
| <b>Md_macrophage</b>                                        | 21263              | 792               | 4191                | 16237            | 43                 |
| <b>Monocyte</b>                                             | 5883               | 248               | 3554                | 2003             | 78                 |
| <b>NK</b>                                                   | 790                | 26                | 592                 | 172              | 0                  |
| <b>Neutrophil</b>                                           | 7337               | 431               | 6117                | 788              | 1                  |
| <b>Plasma_cell</b>                                          | 1294               | 5                 | 1191                | 92               | 6                  |
| <b>Secretory</b>                                            | 3687               | 26                | 1969                | 999              | 693                |
| <b>Squamous_KRT13</b>                                       | 3093               | 103               | 1551                | 1349             | 90                 |
| <b>cDC</b>                                                  | 397                | 31                | 219                 | 145              | 2                  |
| <b>pDC</b>                                                  | 100                | 0                 | 72                  | 28               | 0                  |
| <b>Total</b>                                                | 60158              | 2046              | 28394               | 28192            | 1526               |



| <b>Suppl. Table 4   Data of patients included in OLINK CXCL8 plasma level measurements</b> |                        |                         |                 |
|--------------------------------------------------------------------------------------------|------------------------|-------------------------|-----------------|
| <b>Cohort</b>                                                                              | <b>Number included</b> | <b>Median Age [IQR]</b> | <b>% Female</b> |
| <b>Non-COVID-19 control patients</b>                                                       | 26                     | 73.0 [53.0,77.8]        | 23.1%           |
| <b>Mild to Moderate COVID-19 (WHO 1-4)</b>                                                 | 78                     | 60.0 [47.3,75.8]        | 29.5%           |
| <b>Severe COVID-19 (WHO 5-8)</b>                                                           | 29                     | 72.0 [65.0,75.0]        | 41.4%           |

| <b>Suppl Table 5   ClueGo Term Name (Suppl. Fig. 1f)</b>                        |
|---------------------------------------------------------------------------------|
| antigen processing and presentation of peptide antigen via MHC class I          |
| acute inflammatory response                                                     |
| production of molecular mediator involved in inflammatory response              |
| pre-replicative complex assembly involved in nuclear cell cycle DNA replication |
| DNA unwinding involved in DNA replication                                       |
| DNA replication initiation                                                      |
| macrophage cytokine production                                                  |
| DNA duplex unwinding                                                            |
| chemokine production                                                            |
| interleukin-8 production                                                        |
| regulation of interleukin-8 production                                          |
| negative regulation of tumor necrosis factor production                         |
| positive regulation of chemokine production                                     |
| regulation of toll-like receptor signaling pathway                              |
| negative regulation of toll-like receptor signaling pathway                     |
| positive regulation of cytokine biosynthetic process                            |
| interleukin-8 biosynthetic process                                              |
| positive regulation of nitric oxide biosynthetic process                        |
| interleukin-1 secretion                                                         |
| interleukin-1 beta secretion                                                    |
| regulation of interleukin-1 secretion                                           |
| interferon-gamma-mediated signaling pathway                                     |
| positive regulation of pattern recognition receptor signaling pathway           |
| cellular response to interferon-gamma                                           |
| detection of external biotic stimulus                                           |
| alpha-amino acid biosynthetic process                                           |
